# Supplementary material for: Combined evaluation of the FAS cell surface death receptor and CD8+ tumor infiltrating lymphocytes as a prognostic biomarker in breast cancer
Source: PubMed Central journal article supplement (PMC5362509; doi:10.18632/oncotarget.14779), 2017-01-21
Supplement: oncotarget-08-15610-s001.pdf [file oncotarget-08-15610-s001.pdf]

# Combined evaluation of the FAS cell surface death receptor and CD8+ tumor infiltrating lymphocytes as a prognostic biomarker in breast cancer

## SUPPLEMENTARY FIGURES

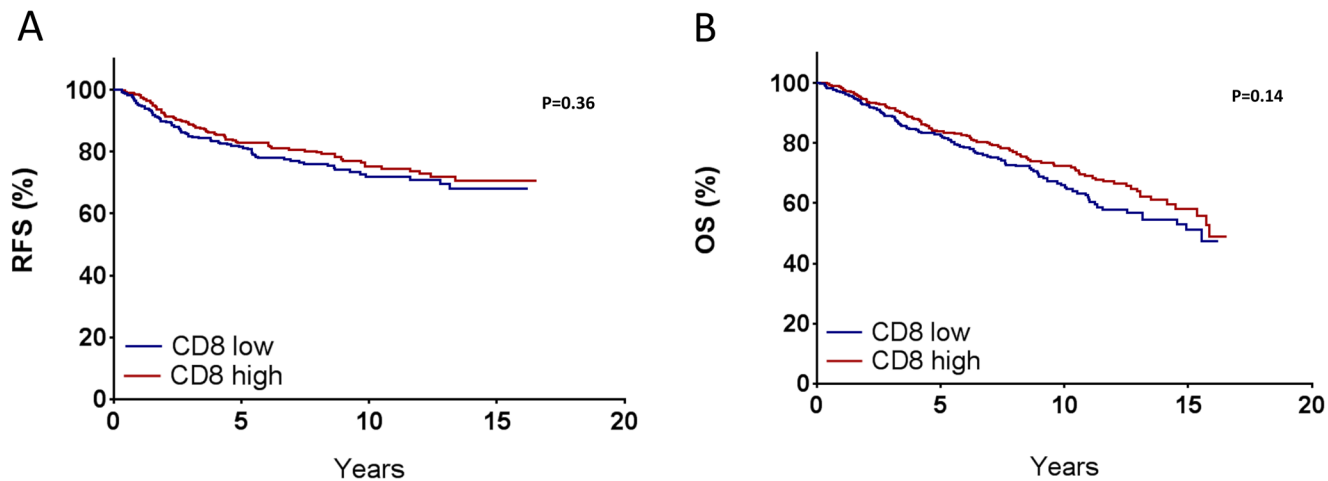

**Supplementary Figure 1:** Kaplan Meier survival analysis, comparing groups with either low or high presence of CD8-positive TILs in the general study population for either RFS **A.** or OS **B.** P-values represent log-rank survival test.

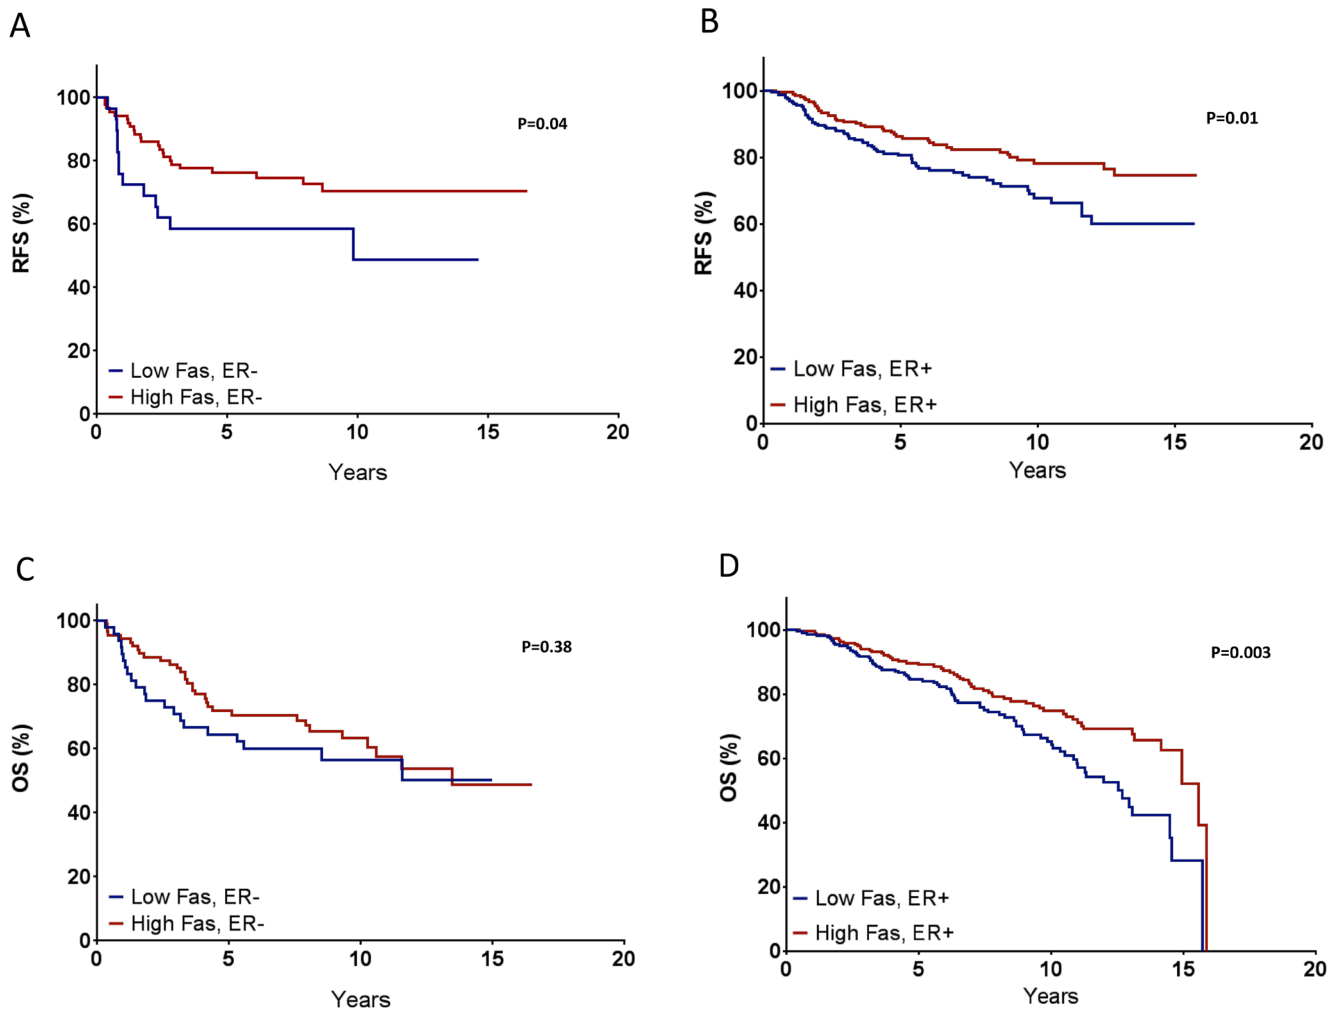

**Supplementary Figure 2: The prognostic effect of FAS expression, stratified on ER-status.** The effect is conserved in both ER-negative **A, C.** and ER-positive tumors **B, D.** for both RFS and OS. P-values represent log-rank survival test.

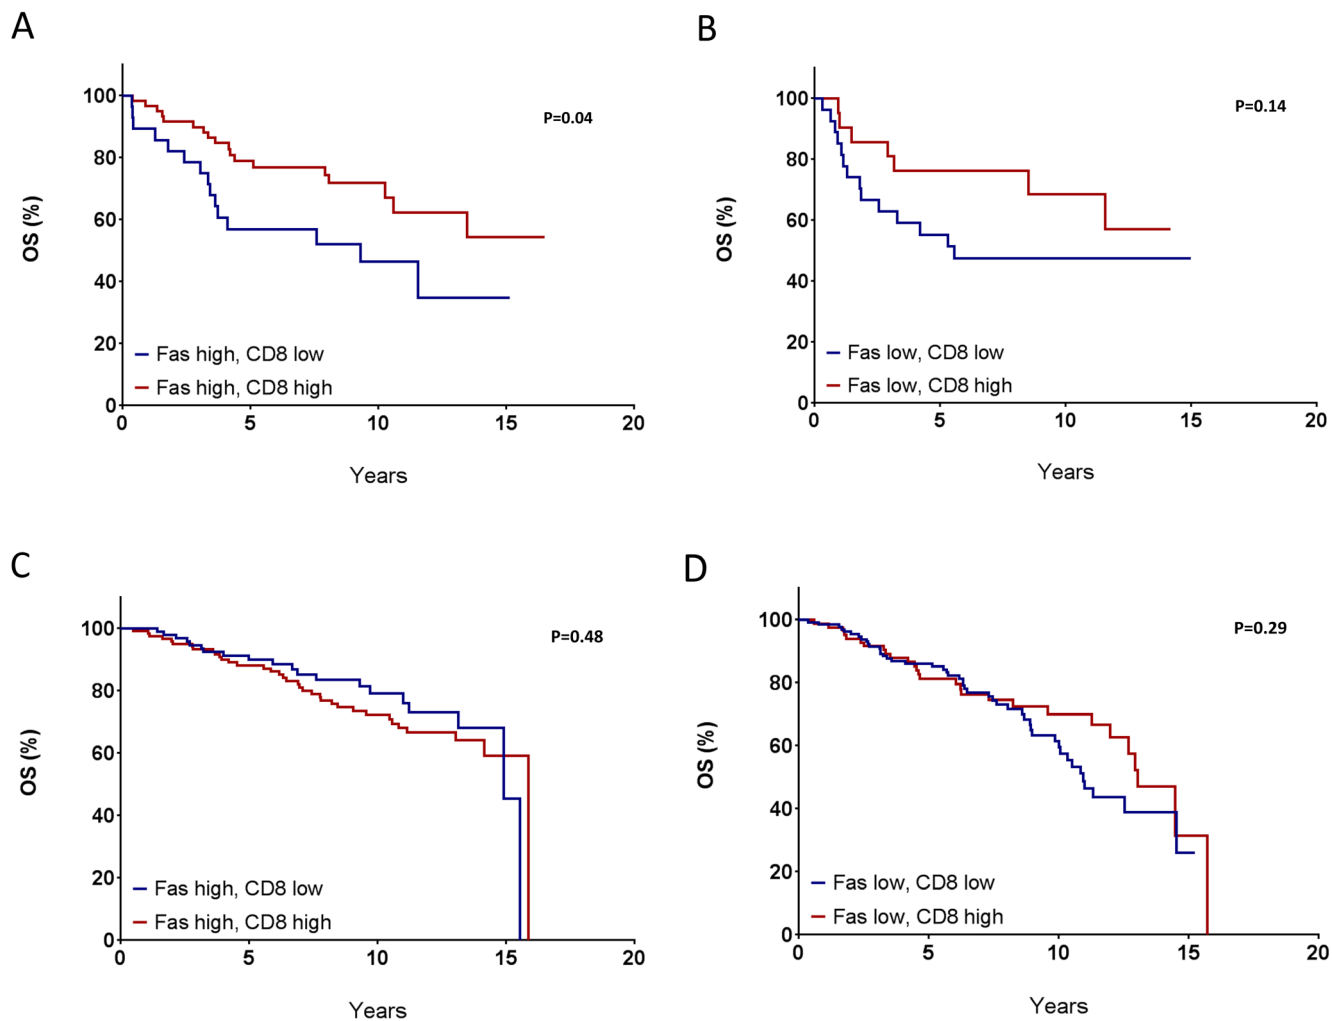

**Supplementary Figure 3: The effect of CD8+ TILs on overall survival, stratified on both ER-status and FAS expression.** In ER-negative tumors with high FAS expression, there is a significant benefit on OS of high CD8+ TIL presence, which is not observed in tumors with low FAS expression **B**. Furthermore, this effect is not shown in ER-positive tumors, either with high **C**. or low **D**. FAS expression.
